# Supplementary material
Source: PubMed Central journal article supplement (PMC7895314)
Supplement: NIHMS1661076-supplement-Supplemental_Figure_1.pdf [file NIHMS1661076-supplement-Supplemental_Figure_1.pdf]

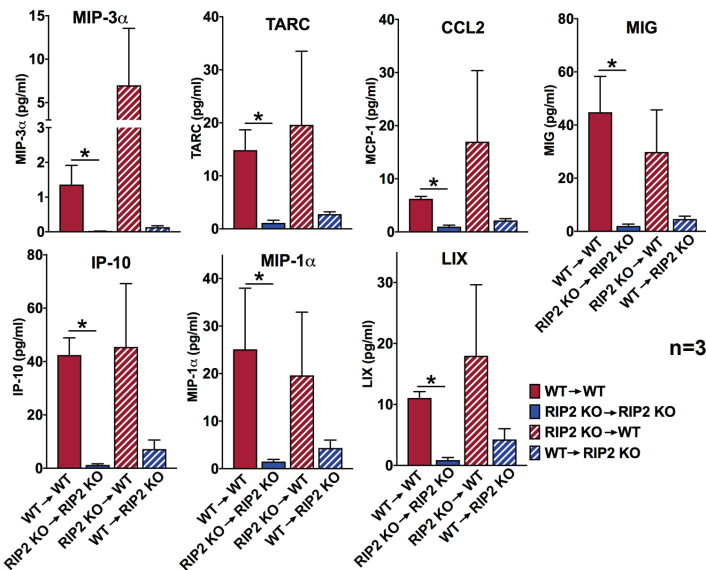

### Supplemental Fig 1. RIP2 within airway structural cells and not hematopoietic cells primarily contributes to inflammatory chemokine production in the lung.

Bone marrow chimeras between WT and RIP2 KO mice were generated as indicated. After a 6wk reconstitution, mice were exposed to HDM i.t. and 24hrs later, a portion of the lung was homogenized, standardized, and subjected to a bead-based multiplex assay for chemokine production. \*p<0.05 using One-way ANOVA.
